# Supplementary material for: Maps of Constitutive-Heterochromatin Distribution for Four Martes Species (Mustelidae, Carnivora, Mammalia) Show the Formative Role of Macrosatellite Repeats in Interspecific Variation of Chromosome Structure
Source: MDPI journal article supplement (doi:10.3390/genes14020489), 2023-02-14
Supplement: s1 [file s1]

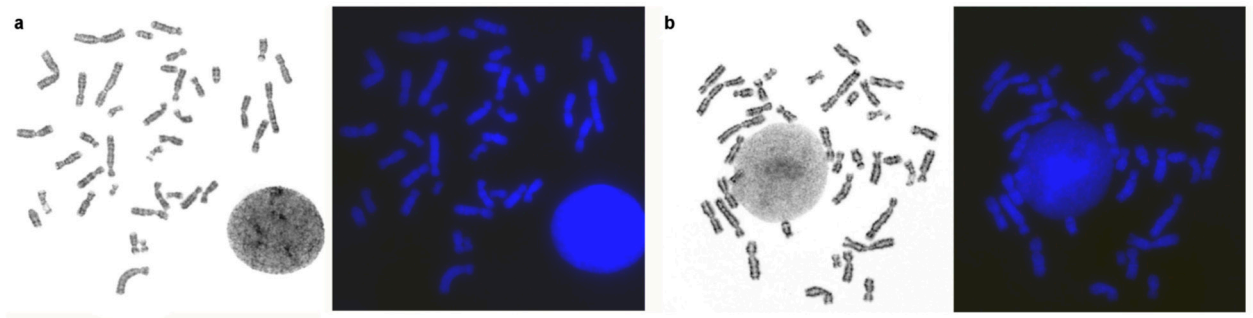

**Figure S1.** Examples of negative result of FISH with (a) MSRs S22+S26 probes and (b) MSRs S40+S46 on the domestic cat chromosomes.
