# Supplementary material for: Maps of Constitutive-Heterochromatin Distribution for Four Martes Species (Mustelidae, Carnivora, Mammalia) Show the Formative Role of Macrosatellite Repeats in Interspecific Variation of Chromosome Structure
Source: Genes (Basel). 2023 Feb 14;14(2):489. doi: 10.3390/genes14020489 (PMC9957230; doi:10.3390/genes14020489)
Supplement: Supplementary file 1 [file genes-14-00489-s001.zip › Suppl Table S1.xlsx]

## Sheet: Лист1
Supplementary Table S1. Primers used to amplify satDNA in the current study.
Name	Start	Stop	Product Length	Tm	Forward primer sequence	Reverse primer sequence
S17H	31	440	410	61.01	CGGAAGAACACGAACGGTGCTC	TTGAAGCGTTTCTGGGAGGCTG
S18H	197	645	449	63.80	CTGCCTTCTGCCCAGAATGCTG	GCTCTGCCTTCGCTGGGAAATC
S22H	704	972	269	62.43	CGCAGGGCTAGAAACCAGCATG	AGTTTGGGAAGCAGGCCTCTGC
S30H	97	416	320	63.16	TCGTGAGCCCAAGGAAACATCG	TGCAGGGAATGGGAAAGGTGG
S32H	20	459	440	61.13	TCCAAAGCTCGCCTTCAGCATC	GGTTTCCCAGGGTTTGTAGCGG
S35H	344	790	447	63.04	CCAGGAGGCAAAGCAACACAGC	TGCCTTAGGCTTGCGGACTCAC
S40H	2381	2780	400	60.30	TCGGAGGAACGAGTTTGGCAAG	TCTTGGAGGGCAGAAGACGTGG
S41H	96	276	181	58.63	TGGGAAGACACTGCCACGAGTG	ACGGACTGGCCACAGTTTGGAG
S48H	565	935	371	61.57	AGCCAGCGCAGCCTTCAATTC	TCAGGCTCGTTTCGTGGAGGTC
S26L	409	833	425	60.74	AGCAGACCGCTTCCAGCATACG	CCCAGAAGCTCATTGCGAGGTG
S46L	108	374	267	59.12	TGAAAGTGGACGCGGTCGATG	TCGGCTCAGTGAAAGGAGTCCG
